# Supplementary material for: Termites Are Resistant to the Effects of Fire at Multiple Spatial Scales
Source: PLoS One. 2015 Nov 16;10(11):e0140114. doi: 10.1371/journal.pone.0140114 (PMC4646461; doi:10.1371/journal.pone.0140114)
Supplement: S1 Dataset — (XLS) [file pone.0140114.s001.xls]

## Sheet: Supplementary file_termite site
Data used in site scale analysis
Predictor variables (standardised)							Termite species (presence/absence)								Species richness		Vegetation type
number of logs	tree density	proportion of bare ground	Max litter depth	DBH	Structural Complexity	Presence/absence of Triodia	Heterotermes ferox	Coptotermes frenchi	Microcerotermes cavus	Amitermes spp	Nasutitermes exitiosus	Tumulitermes sp 1	Schedorhinotermes reticulatus	Microcerotermes sp. 1	SpR	Landscape	veg.class	Time since fire
-0.04	-0.41	0.53	-0.29	1.16	-0.57	1	1	1	1	0	0	0	0	0	3	1	TM	102
-0.55	-0.16	-0.48	-0.29	2.02	-0.36	1	1	1	1	0	1	0	0	0	5	1	TM	90
-0.04	0.59	-0.99	-0.29	0.77	-0.71	1	1	0	0	0	0	0	0	0	1	1	TM	56
0.48	-0.79	-0.4	-0.29	0.3	-0.15	1	1	1	0	0	1	0	0	0	3	1	TM	51
0.22	-0.03	0.19	4.7	1.08	0.27	1	1	0	1	0	0	0	0	0	2	1	TM	66
-0.81	0.09	-0.57	-0.88	0.89	0.27	1	0	1	1	0	0	0	0	0	3	2	TM	68
-0.81	0.09	-0.65	0.29	1.14	-0.43	1	1	1	0	0	0	0	0	0	2	2	TM	77
1.52	-0.66	-0.74	-0.59	2.5	-0.29	0	1	1	0	0	0	0	0	0	2	2	CM	81
0.74	-0.91	-0.91	-0.29	1.34	-0.08	0	1	1	1	0	0	0	0	1	4	2	CM	57
3.08	-0.66	-0.99	-0.59	-0.23	1.33	1	1	1	1	0	1	0	0	1	5	2	TM	27
-0.55	-0.41	-0.65	-0.59	0.35	1.19	1	1	1	1	0	0	0	0	0	3	3	TM	46
-0.55	-0.79	0.45	0	0.04	1.75	1	1	1	1	0	0	0	0	0	3	3	TM	53
-0.81	-0.41	0.45	0	-0.13	-0.43	1	1	1	1	0	0	0	0	0	3	3	TM	32
0.74	0.72	0.02	-0.59	0.8	-0.08	1	1	0	1	0	1	0	0	0	3	3	TM	62
0.48	-0.41	1.04	-0.88	-0.97	-0.71	1	1	0	0	0	0	0	0	0	2	3	TM	9
1.26	-0.16	1.21	-0.59	-0.9	0.13	1	1	1	0	0	0	0	0	0	3	4	TM	9
0.22	0.72	1.55	-0.88	-0.59	-0.85	1	1	1	1	0	0	0	0	0	3	4	TM	9
-0.55	0.59	-1.42	0	-0.46	1.19	1	1	1	0	0	0	0	0	0	2	4	HM	35
-0.55	-0.41	0.7	0	1.2	-0.01	1	0	1	0	0	0	0	0	0	2	4	HM	67
1.26	-0.41	-1.42	-0.59	1.41	-0.22	0	1	1	0	1	1	0	0	0	4	4	CM	94
1	-0.29	-0.57	0.29	0.8	-0.08	1	0	0	0	0	0	0	0	0	0	5	TM	67
3.34	1.09	-0.65	3.23	0.7	0.2	0	1	0	0	0	1	0	0	0	2	5	CM	40
3.86	0.47	-0.15	-0.88	1.53	-0.64	0	0	1	0	0	1	0	1	0	3	5	CM	75
-0.04	0.22	-1.33	1.76	2.31	-0.08	0	0	0	0	1	1	0	0	1	4	5	CM	123
3.6	-0.54	-0.74	3.23	1.77	-0.01	0	1	1	0	0	1	0	0	0	3	5	CM	32
0.22	-0.03	-1.33	0.29	1.52	-0.57	0	1	0	0	0	1	0	0	0	2	6	CM	97
-0.55	0.72	0.02	-0.88	0.75	-1.06	0	0	0	1	0	1	0	0	0	3	6	CM	65
-0.55	-0.29	-1.5	0.59	0.63	0.2	0	0	1	0	0	1	0	0	0	2	6	CM	58
1	0.34	-0.91	0	0.07	-0.22	0	1	0	0	0	0	0	0	0	1	6	TM	41
-0.29	2.1	-1.08	0.29	0.57	0.34	0	1	1	1	0	0	0	0	0	3	6	CM	58
-0.55	1.09	-0.65	-0.59	-0.49	0.13	1	0	0	0	0	0	0	0	0	0	7	TM	35
-0.04	1.85	-0.65	0.29	-0.22	0.2	1	1	0	0	0	1	0	0	0	2	7	TM	36
-0.81	-0.29	-0.4	-0.29	0.11	0.84	1	1	0	0	0	0	0	0	0	1	7	TM	29
0.22	2.98	-0.57	1.76	-0.62	1.96	1	1	1	0	0	1	0	0	0	3	7	TM	27
-0.29	1.47	-0.82	0.29	-0.49	0.2	1	1	0	1	0	1	0	0	0	3	7	TM	29
1.26	0.22	-0.48	-0.88	0.64	-0.36	0	1	1	1	0	1	0	1	0	5	8	CM	50
0.22	1.6	-0.91	0.29	-0.86	1.12	1	1	0	1	0	1	0	0	0	4	8	TM	27
-0.29	1.6	-0.74	0.59	-0.7	-0.15	1	1	0	0	1	1	0	0	0	3	8	TM	27
-0.55	0.97	-0.06	0.29	-0.62	-0.22	1	1	1	0	0	0	0	0	1	4	8	TM	27
-0.81	1.22	-0.91	-0.59	-0.46	-0.99	1	1	1	0	1	0	0	0	0	3	8	TM	27
-0.81	0.47	1.21	-1.03	-0.45	-1.2	1	1	1	0	0	0	0	0	0	2	9	TM	3
-0.81	0.97	-1.08	-0.59	-0.6	0.84	1	1	1	0	0	0	0	0	0	2	9	TM	27
-0.81	3.35	-1.25	0.29	-0.95	0.77	1	1	1	0	0	0	0	0	0	2	9	TM	27
-0.29	1.35	0.02	-0.59	-0.76	-0.43	1	1	1	1	0	0	0	0	0	3	9	TM	3
-0.81	0.47	1.88	-0.59	-1.07	0.49	1	1	0	0	0	0	0	0	0	2	9	TM	3
-0.04	3.48	-1.25	-0.59	-0.57	-1.34	0	1	1	1	1	1	0	0	0	5	10	CM	3
-0.04	-0.03	-0.99	0.29	1.87	0.41	0	1	1	0	1	1	0	0	0	4	10	CM	27
-0.81	2.1	-1.58	0	-0.29	1.4	1	1	0	0	0	0	0	0	0	1	10	TM	35
-0.81	1.97	-0.4	-0.59	-0.45	1.26	1	1	1	0	0	0	0	0	0	2	10	TM	3
-0.55	3.23	-1.42	0.29	-0.76	1.19	1	1	1	0	0	1	0	0	0	3	10	TM	27
-0.81	0.72	2.22	-1.03	-1.07	-0.85	1	1	0	1	0	0	0	0	0	2	11	TM	2
0.48	0.09	-0.82	1.47	1.39	0.84	0	1	1	1	1	1	0	0	0	5	11	CM	71
-0.81	-0.66	0.28	-0.88	-0.94	1.33	1	1	1	0	0	1	0	0	0	3	11	TM	7
-0.81	0.47	-1.08	0	-0.7	1.68	1	0	1	0	0	0	0	0	0	1	11	TM	32
-0.81	0.97	-0.06	-0.59	-0.74	1.26	1	1	1	0	0	0	0	0	0	2	11	TM	27
2.56	-0.54	-0.74	-0.29	-0.04	-0.43	0	0	0	0	0	1	0	1	0	2	12	CM	32
1	0.72	-0.65	0.29	-0.23	0.77	0	1	1	0	0	1	0	0	0	3	12	CM	32
0.22	-0.16	-0.06	0	0.43	0.77	0	1	1	1	0	1	0	1	0	5	12	CM	32
-0.81	0.72	-0.82	1.76	-0.2	1.12	1	0	1	0	0	1	0	0	0	2	12	CM	32
1	-1.16	-0.48	0.59	0.48	-1.2	0	1	0	1	1	0	0	0	0	3	12	CM	32
-0.81	-0.16	1.97	-0.88	-1.07	-1.62	1	1	0	1	0	0	0	0	0	2	13	TM	1
-0.81	-0.41	2.14	-1.18	-1.07	-2.05	1	1	1	0	0	0	0	0	0	2	13	TM	1
-0.81	-0.16	1.72	-0.88	-1.07	-1.91	1	1	1	0	0	0	0	0	0	2	13	TM	1
-0.04	-0.66	1.29	-0.88	-1.07	-1.98	1	0	1	0	0	1	0	0	0	2	13	TM	1
-0.55	0.09	2.65	-1.18	-1.07	-1.91	1	1	1	0	0	0	0	0	0	2	13	TM	1
-0.81	0.09	2.05	-1.03	-1.07	-1.48	1	1	0	0	0	0	0	0	0	1	14	TM	1
-0.55	0.22	1.8	-1.03	-1.07	-0.92	0	1	0	0	1	0	0	0	0	2	14	CM	1
-0.55	-1.16	0.87	-1.03	-1.07	-0.43	0	1	1	0	1	0	1	0	0	4	14	CM	1
-0.81	-0.29	2.22	-1.03	-1.07	-1.83	0	1	1	0	0	0	0	0	0	2	14	TM	1
-0.81	-0.03	1.97	-1.03	-1.07	-1.2	0	1	1	0	1	0	0	0	0	3	14	TM	1
-0.04	-0.54	0.02	-0.59	0.55	-0.5	1	1	0	0	0	0	0	0	0	1	15	TM	51
-0.29	0.47	-0.65	-0.59	-0.13	1.26	1	1	0	1	0	0	1	0	0	3	15	TM	35
0.22	-0.03	-0.06	-0.59	-0.14	0.98	1	1	1	0	0	0	0	0	0	2	15	TM	35
-0.55	-0.91	-1.08	-0.29	2.03	-0.78	0	0	0	0	0	0	0	0	0	0	15	CM	66
-0.81	-0.16	-1.16	-0.59	-0.31	0.06	1	1	1	0	0	0	0	0	0	2	15	TM	35
-0.55	-1.16	0.36	0	0.65	0.27	0	1	0	0	1	0	1	0	0	3	16	CM	48
-0.04	-0.91	-0.48	-0.59	1.88	-0.43	0	1	1	0	0	0	1	0	0	3	16	CM	74
0.48	-1.16	-0.74	-0.59	3.5	-0.92	0	1	0	0	1	0	0	1	0	3	16	CM	95
1	-0.66	-0.48	-0.29	3.81	-0.5	0	0	0	0	0	1	0	1	0	2	16	CM	105
0.22	-1.42	-0.48	-0.59	1.8	-1.06	0	0	0	0	1	0	1	1	0	3	16	CM	61
-0.81	-1.04	0.02	-0.29	0.93	1.61	1	0	0	0	0	0	0	0	0	0	17	HM	59
-0.81	-0.29	-0.99	-0.59	-0.27	2.88	1	1	0	0	0	0	0	0	0	1	17	HM	41
0.48	-0.54	-0.23	-0.59	-0.89	0.84	0	1	0	0	0	0	0	0	0	1	17	HM	19
2.56	0.09	-1.16	-0.59	-0.81	3.09	0	1	0	0	0	0	0	0	0	1	17	HM	19
2.82	-0.54	-0.15	-0.88	-0.34	0.63	0	1	1	0	0	0	0	0	0	2	17	HM	19
0.74	1.97	-0.06	1.47	-0.48	2.1	1	1	1	0	0	1	0	0	0	3	18	HM	19
-0.55	-1.04	-0.65	-0.88	0.47	2.24	1	1	0	0	0	0	0	0	0	1	18	HM	46
-0.04	0.09	-1.08	-0.29	-0.78	1.75	1	1	0	0	0	1	0	0	0	2	18	HM	19
-0.81	1.97	-0.57	-0.59	-0.94	0.49	1	1	0	0	0	1	0	0	0	2	18	HM	19
-0.81	0.22	0.02	-0.59	-0.62	1.61	1	1	0	0	0	0	0	0	0	1	18	HM	19
0.48	-0.91	1.55	-0.88	-1.07	-0.29	1	0	1	0	0	1	0	0	0	2	19	TM	3
-0.04	-0.91	1.97	-0.88	-1.07	-0.78	1	1	0	0	0	0	0	0	0	1	19	TM	3
0.22	-1.29	-0.32	0.29	1.28	-0.15	1	1	1	0	0	0	0	0	0	2	19	TM	86
-0.04	-0.79	0.53	2.05	-0.66	-0.43	1	1	1	0	1	0	1	0	0	4	19	TM	22
-0.81	-0.54	1.88	-1.03	-1.07	-0.85	1	0	1	0	0	0	0	0	0	1	19	TM	3
-0.81	-1.54	1.04	-1.03	-1.45	-1.98	0	0	0	0	0	0	0	0	0	0	20	CM	22
2.82	-0.91	-0.15	0.29	-0.53	0.56	1	1	1	0	0	0	0	0	0	2	20	TM	22
-0.55	-0.91	-0.06	-0.29	-0.02	-0.64	0	1	0	0	0	1	0	0	0	2	20	CM	35
0.48	-1.04	-0.15	0.88	-0.53	-1.06	1	1	1	0	1	1	0	0	1	5	20	CM	35
-0.29	-0.79	0.53	-0.59	-0.5	-0.29	1	0	1	0	0	0	0	0	1	2	20	CM	35
-0.55	-0.79	-0.65	0.59	-0.02	1.47	1	1	1	0	0	0	0	0	0	2	21	TM	22
-0.04	-0.54	0.7	0	-0.45	-0.29	1	1	0	0	0	1	0	0	1	3	21	TM	22
-0.81	-0.54	-0.48	0.29	-0.4	-0.36	1	1	0	0	0	0	0	1	0	2	21	TM	31
-0.55	-0.03	-0.4	0.88	1.5	-1.13	1	0	1	1	0	1	0	0	0	3	21	TM	81
-0.81	-0.79	0.36	-0.59	1.42	-0.64	1	1	0	0	1	1	1	0	0	4	21	CM	81
-0.04	-0.54	0.45	1.17	-0.41	0.27	1	1	0	1	0	0	1	0	0	3	22	TM	31
-0.29	-1.04	-0.4	0.29	-0.03	0.98	1	0	0	0	0	0	0	1	1	2	22	CM	31
-0.29	-0.91	-0.23	0.29	0.47	0.27	1	1	0	0	0	1	0	0	1	3	22	TM	31
-0.81	-0.41	0.36	-0.29	-0.17	-0.08	1	0	0	0	0	0	1	0	0	1	22	TM	31
-0.29	-0.03	-0.23	0	0.14	0.49	1	1	1	0	0	0	0	0	1	3	22	TM	31
-0.04	-0.54	-0.06	-0.29	-0.56	0.27	1	1	1	0	0	0	1	1	0	4	23	TM	23
0.74	-1.16	-0.23	-0.59	1.31	-0.15	0	0	0	0	0	0	0	0	1	2	23	CM	55
-0.29	-1.16	1.38	-0.88	-0.91	-1.34	1	0	0	0	0	0	1	0	1	2	23	CM	6
-0.81	-0.03	-0.06	-0.29	-0.55	0.2	1	0	1	0	0	0	0	0	0	1	23	TM	28
-0.04	-0.29	1.46	0.29	-0.66	-0.36	1	1	1	0	0	0	0	0	0	2	23	TM	10
-0.81	1.85	1.04	0	-1.05	-0.08	1	1	1	1	0	0	0	0	0	3	24	TM	9
1.78	-0.54	-0.32	2.93	0.26	-1.06	1	1	0	1	0	0	1	0	0	3	24	TM	28
0.48	-0.03	0.45	0.29	0.86	-1.06	1	1	0	0	0	1	0	0	0	3	24	TM	71
1.52	-0.41	0.11	1.76	0.05	-0.15	1	0	1	0	0	0	0	0	0	1	24	TM	22
-0.04	-0.29	2.22	-0.88	-1.07	-0.08	1	1	1	0	0	0	0	0	0	2	24	TM	4
-0.81	-0.54	0.62	-0.88	-0.83	0.41	1	1	1	0	0	0	0	0	0	2	25	TM	9
-0.81	1.97	1.21	-1.03	-0.7	-0.78	1	1	1	0	0	1	0	1	0	4	25	TM	2
-0.04	-0.16	-1.16	-0.29	-0.29	0.98	1	1	1	1	0	0	1	0	0	4	25	TM	32
-0.04	0.72	-0.82	1.17	-0.18	0.41	1	1	1	0	0	0	1	1	0	4	25	TM	32
0.48	-0.91	-0.65	1.76	0.51	-0.57	1	1	1	1	0	1	0	0	0	4	25	CM	51
0.22	-0.29	-1.08	0.29	0.79	0.13	0	1	1	0	0	0	0	1	0	3	26	CM	55
-0.81	-0.03	1.63	-1.18	-1	-1.34	1	1	1	0	1	0	0	0	0	3	26	TM	32
-0.81	0.72	1.72	-1.03	-1.07	-1.69	0	0	0	1	0	1	0	0	0	2	26	TM	1
-0.81	0.22	-0.4	-0.29	-0.32	-0.01	1	0	1	0	0	0	1	0	0	2	26	TM	32
1.52	-0.91	-0.82	1.76	0.02	-0.08	1	1	0	0	0	1	0	1	0	3	26	CM	35
-0.55	-0.41	-0.06	0.88	0.06	0.77	1	0	0	0	0	0	0	0	0	0	27	TM	32
-0.81	-0.79	-0.15	-0.59	0.37	-0.15	1	0	1	0	0	0	0	0	0	1	27	TM	32
-0.29	-0.54	0.7	1.76	0.41	-0.99	1	1	0	1	0	0	0	0	0	2	27	TM	32
-0.55	-0.41	-0.23	-0.59	-0.81	-0.15	1	1	0	0	0	0	0	0	1	2	27	TM	10
0.22	-0.41	1.46	0.88	-0.73	-0.64	1	1	1	0	0	0	0	0	1	3	27	TM	10
-0.55	-0.79	1.29	-0.29	-0.84	0.56	0	1	1	0	0	0	0	0	0	3	28	TM	8
1	-0.79	-0.57	1.76	-0.13	0.41	1	0	0	0	0	0	0	0	0	0	28	TM	32
-0.81	-0.41	0.53	-0.29	-1.07	-0.92	1	1	0	0	0	0	0	1	1	3	28	TM	3
-0.55	-0.16	-0.15	2.05	-0.23	0.2	1	0	0	1	0	0	0	0	0	1	28	TM	32
-0.55	-1.29	0.19	0.88	-0.33	1.12	1	0	0	0	0	0	0	0	1	1	28	TM	9
