# Supplementary material for: Termites Are Resistant to the Effects of Fire at Multiple Spatial Scales
Source: PLoS One. 2015 Nov 16;10(11):e0140114. doi: 10.1371/journal.pone.0140114 (PMC4646461; doi:10.1371/journal.pone.0140114)
Supplement: S2 Dataset — (XLS) [file pone.0140114.s002.xls]

## Sheet: S3_Termite landscape
Data used in landscape scale analysis
		Predictor landscape variables (standardised)						Termite species (proportion of sites found)
Landscape	# Sites	mean annual rainfall	% old mallee	% fire age >1997, 20 years	extent of TM	diversity of veg types	diversity of fire ages	Prop_Hferox	Prop_Cfrenchi	Prop_Mcavus	Prop_Amitermes	Prop_Nexitiosus	Prop_Tumulitermes	Prop_Sreticulatus	Prop_Msp1	Species Richness
1	25	0.930913	1.6807	-0.714742	0.881385	-0.829705	-1.65708	0.92	0.16	0.16	0.04	0.08	0.04	0	0	7
2	25	1.12635	1.23646	-0.725212	0.911777	-0.829705	-0.495083	0.96	0.2	0.16	0	0.04	0	0	0.08	6
3	25	0.782151	0.644145	0.0441931	1.00295	-1.35862	0.770715	0.92	0.12	0.16	0	0.04	0	0	0.04	6
4	25	0.892993	-0.155483	1.50186	0.577459	0.268819	0.27054	0.96	0.32	0.04	0.04	0.12	0	0	0.04	7
5	25	0.356281	1.17723	-0.725212	-1.67159	-0.097356	-0.426714	0.72	0.24	0.16	0.12	0.24	0.08	0.04	0.04	9
6	25	0.464207	1.71032	-0.725212	-0.212748	1.24528	-1.71023	0.8	0.16	0.12	0	0.12	0	0	0	5
7	25	0.53713	0.555298	-0.725212	0.334318	0.67568	0.427485	0.92	0.16	0.08	0	0.12	0.04	0	0	5
8	25	0.732563	-0.39241	-0.0872509	-0.212748	1.28597	1.04419	0.8	0.24	0.08	0.12	0.16	0	0.04	0.12	9
9	25	0.475874	-0.984728	1.24065	0.790207	-0.341472	0.828565	0.64	0.16	0.04	0	0	0	0	0	4
10	25	0.478791	-0.925496	2.28828	0.273533	0.960482	0.322025	0.72	0.16	0.04	0.12	0.12	0	0	0	5
11	25	-0.0870908	-0.422026	-0.427173	0.516674	0.350191	1.84137	0.84	0.16	0.08	0.16	0.16	0	0	0.04	6
12	25	-0.174598	-1.25127	-0.725212	-1.97552	-1.19588	-1.71023	0.68	0.2	0.12	0.08	0.32	0	0.08	0.04	7
13	15	-1.34137	0.0222119	1.39659	0.273533	0.797738	0.184733	0.866667	0.266667	0.0666667	0	0.0666667	0.0666667	0	0	5
14	15	-1.70015	-0.214715	1.71202	-0.151963	1.24528	0.0823178	0.866667	0.2	0.0666667	0.266667	0	0.133333	0	0	5
15	24	-1.37637	1.62147	-0.609474	-1.03335	1.08254	-1.32963	0.791667	0.125	0.166667	0.166667	0.0416667	0.0416667	0.0416667	0.0833333	8
16	25	-1.48138	1.62147	-0.623311	-1.42845	0.472249	-1.36561	0.6	0.08	0.08	0.24	0.04	0.2	0.12	0.04	8
17	25	1.44721	-0.629337	-0.725212	-2.00591	-1.48068	-0.290806	0.76	0.04	0	0	0	0	0	0	2
18	25	1.05342	-1.10319	-0.725212	-2.00591	-1.48068	-1.19843	0.88	0.04	0.04	0	0.16	0	0	0	4
19	24	-1.28594	-0.836649	1.84496	0.151963	0.87911	0.552044	0.666667	0.25	0	0.291667	0.0416667	0.0833333	0	0	5
20	25	-1.12551	-0.89588	-0.710441	0.364711	0.634993	-0.618535	0.48	0.12	0.08	0.12	0.08	0	0	0.08	6
21	25	-1.21594	-0.0666357	-0.725212	0.0607851	1.00117	1.29414	0.76	0.16	0.04	0.04	0.16	0.04	0.04	0.08	8
22	25	-0.909662	-0.836649	-0.725212	0.820599	-0.504217	-0.591132	0.44	0.12	0.04	0.08	0.04	0.08	0.08	0.2	9
23	24	-0.982585	0.46645	-0.199623	0.94217	-0.99245	1.59447	0.708333	0.166667	0	0.125	0	0.125	0.0416667	0.166667	7
24	25	-0.886326	0.999536	-0.594703	0.850992	-0.911078	0.476201	0.76	0.12	0.12	0.12	0.08	0.12	0	0.04	9
25	25	0.97175	-0.718185	-0.436522	0.455889	0.350191	0.480077	0.96	0.2	0.16	0.04	0.08	0.12	0.08	0	7
26	25	0.761732	0.140675	-0.463259	-0.516674	1.32666	0.90247	0.8	0.2	0.04	0.2	0.08	0.08	0.08	0.04	9
27	25	1.00092	-1.19204	1.47381	0.972562	-1.07382	0.366036	0.6	0.08	0.04	0.04	0	0	0	0.28	5
28	25	0.554631	-1.25127	-0.10894	1.03335	-1.48068	-0.0439022	0.72	0.08	0.08	0.24	0.04	0.04	0.04	0.36	10
